# Supplementary material for: Pigment Production by Paracoccus spp. Strains through Submerged Fermentation of Valorized Lignocellulosic Wastes
Source: MDPI journal article supplement (doi:10.3390/fermentation8090440), 2022-09-05
Supplement: s1 [file s1]

Archive with 1 entries (1 files):
- fermentation-1855354-supplementary.pdf
