# Supplementary material for: Pigment Production by Paracoccus spp. Strains through Submerged Fermentation of Valorized Lignocellulosic Wastes
Source: MDPI journal article supplement (doi:10.3390/fermentation8090440), 2022-09-05
Supplement: s1 [file s1 › fermentation-1855354-supplementary.pdf]

Supplementary Figures:

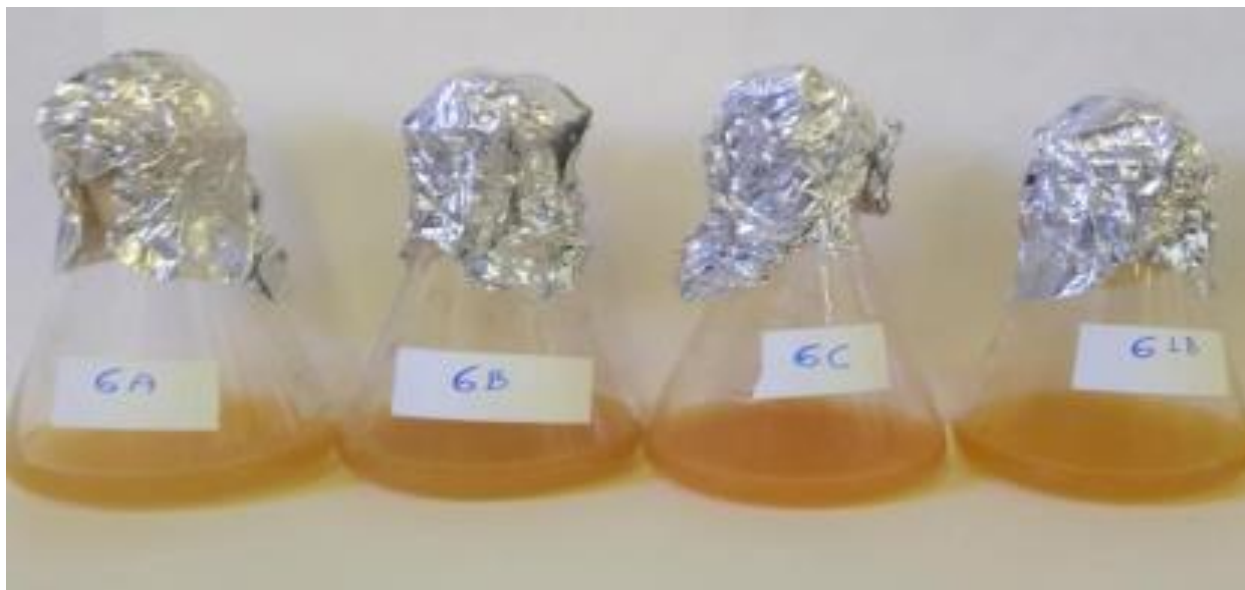

**Figure S1.** *P. aminophilus* CRT1 (code- 6) in different liquid growth media i.e., **6A** (based on NaOH pretreated wheat straw hydrolysate), **6B** (based on NaOH pretreated sawdust hydrolysate), **6C** (based on microwave-assisted  $\text{Ca}(\text{OH})_2$  pretreated sawdust hydrolysate), **6 LB** (Luria Bertani broth medium).

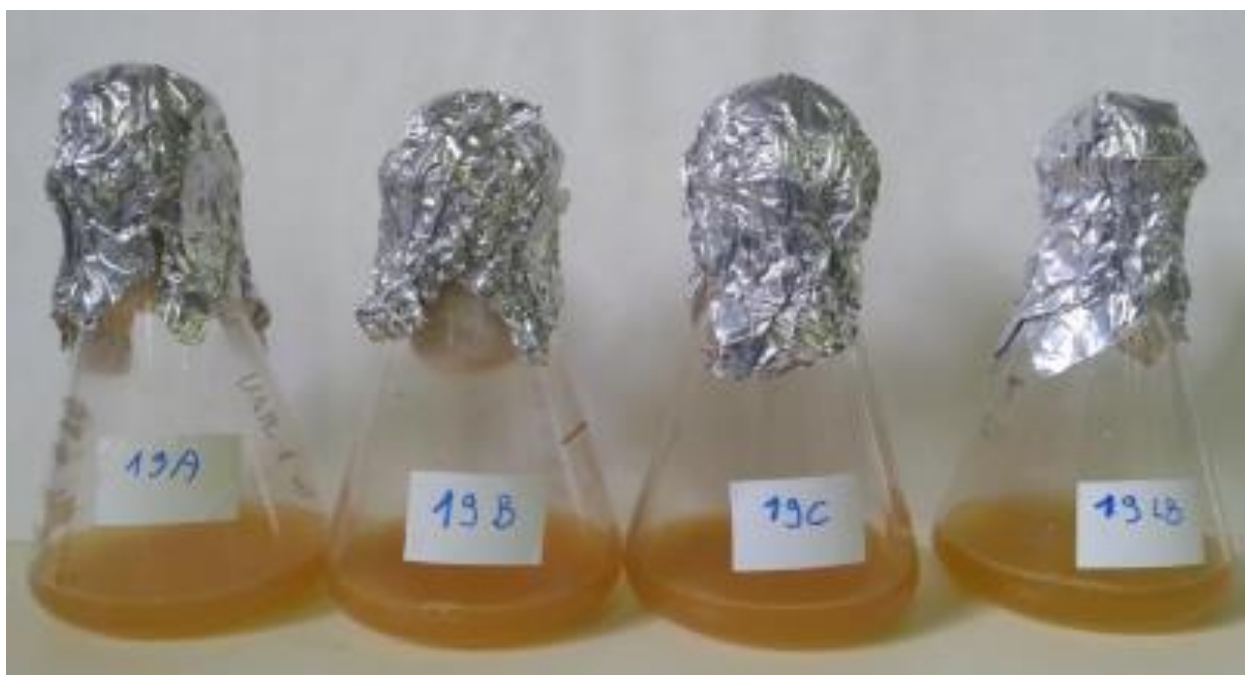

**Figure S2.** *P. kondratievae* CRT2 (code-19) in different liquid growth media: **19A** (based on NaOH pretreated wheat straw hydrolysate), **19B** (based on NaOH pretreated sawdust hydrolysate), **19C** (based on microwave-assisted  $\text{Ca}(\text{OH})_2$  pretreated sawdust hydrolysate), **19 LB** (Luria Bertani broth medium).
